# Supplementary material
Source: Springer Nature journal article supplement (https://www.springermedizin.de/resource/supplementary/13058_2010_2751_MOESM8_ESM.pdf/9702078)

Plotted SNPs

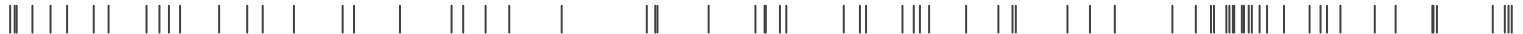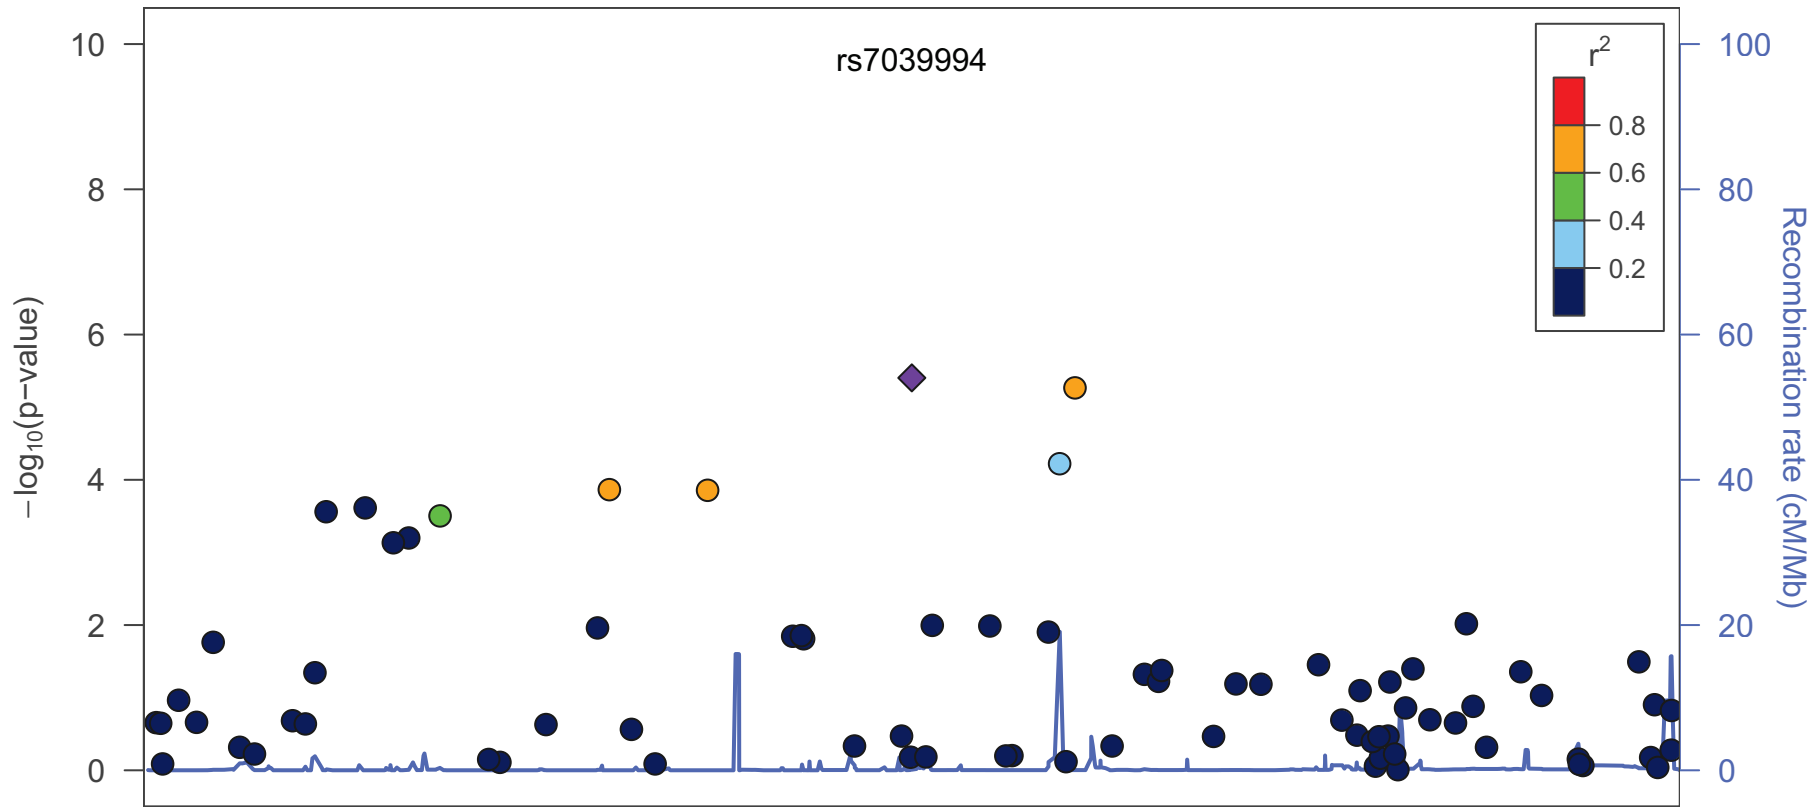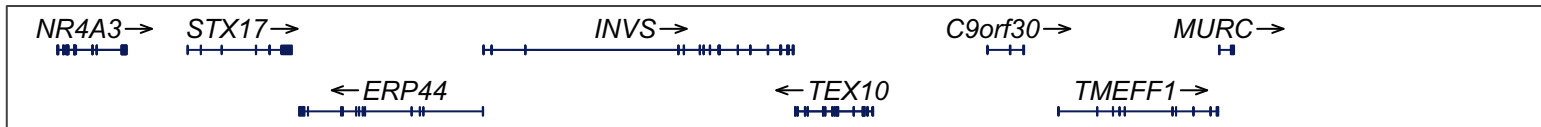

101.6                      101.8                      102                      102.2                      102.4  
Position on chr9 (Mb)

Supplement: MOESM8 [file 9702078]
